# Supplementary material for: Development and implementation of a geographical area categorisation method with targeted performance indicators for nationwide EMS in Finland
Source: Springer Nature journal article supplement (doi:10.1186/s13049-018-0506-1), 2018-05-15

Thematic map of risk categories

Example of risk categories around city of Jyväskylä, Central Finland based on 2016 EMS missions and population in Jan. 2017.

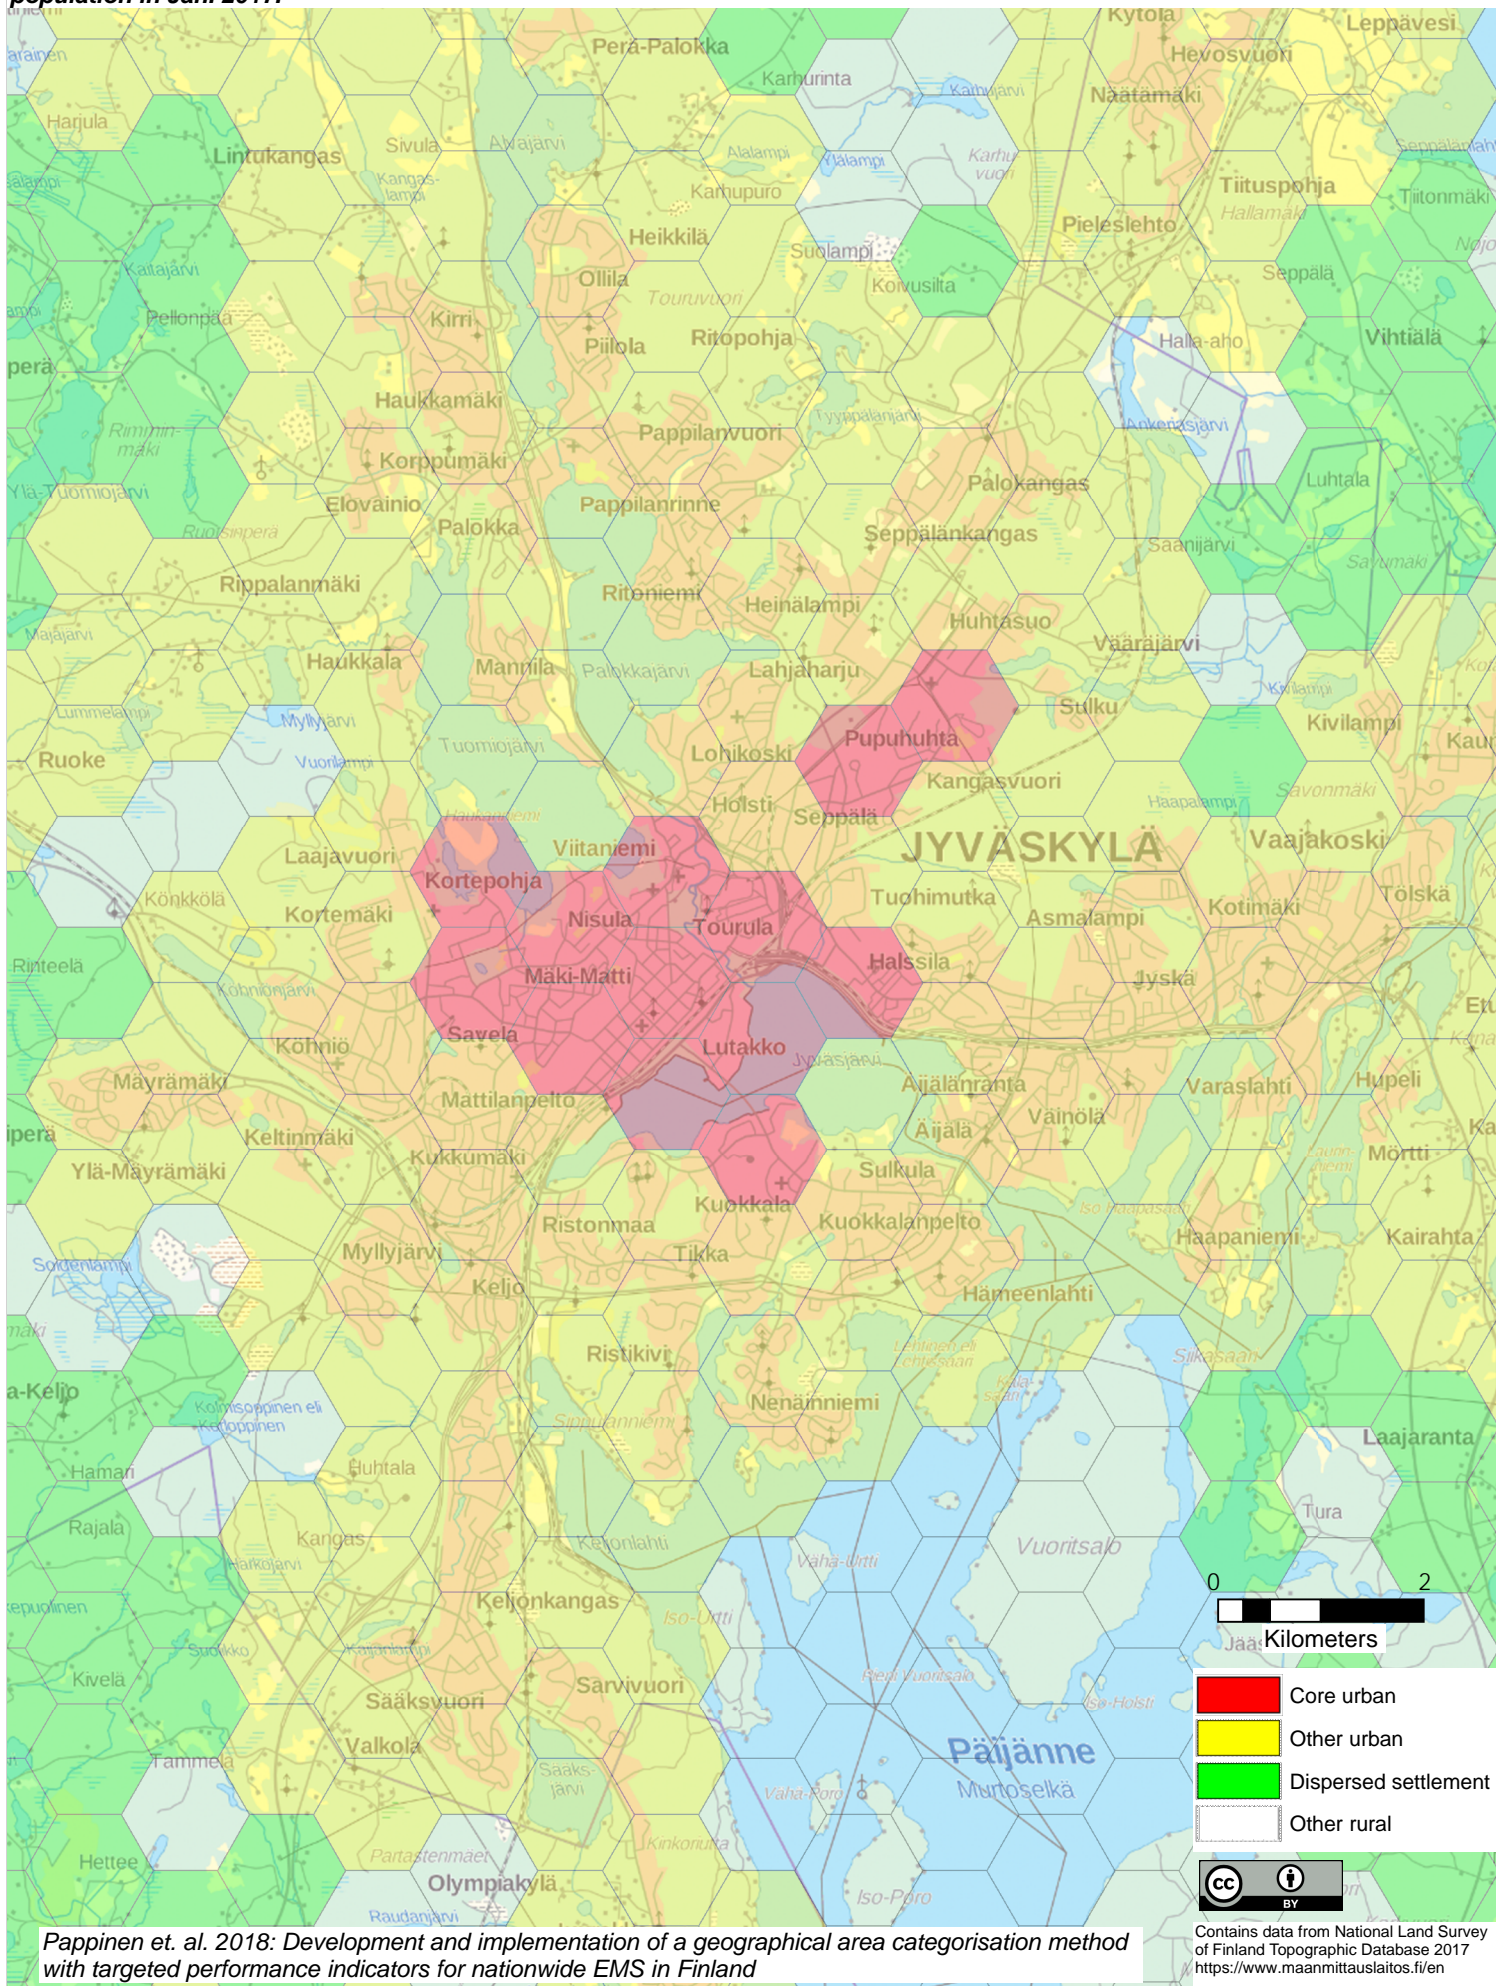

Supplement: MOESM1 [file 15765496]
